# Supplementary material for: A Novel High-Affinity Potassium Transporter IbHKT-like Gene Enhances Low–Potassium Tolerance in Transgenic Roots of Sweet Potato (Ipomoea batatas (L.) Lam.)
Source: MDPI journal article supplement (doi:10.3390/plants11111389), 2022-05-24
Supplement: s1 [file s1]

## Supplements

Table S1 Primer information and function of *IbHKT-like* gene

| Gene             | Upstream Primer<br>(5'→3') | Downstream Primer<br>(5'→3') | Function                                      |
|------------------|----------------------------|------------------------------|-----------------------------------------------|
| <i>IbHKT-lik</i> | ATGATGATGGGG               | TTATGATAATTTC                | Gene clone                                    |
| <i>e</i>         | TTCCGAAC                   | CAAGCTT                      |                                               |
| <i>IbHKT-lik</i> | GTATTCCTGAGA               | AGCCCTGATGAC                 | Real-time<br>fluorescence<br>quantitative PCR |
| <i>e</i>         | CTTTCCGTAT                 | TTCCAC                       |                                               |
| <i>IbARF</i>     | CTTTGCCAAGAA               | TCTTGTCCTGAC                 | Internal reference                            |
|                  | GGAGATGC                   | CACCAACA                     |                                               |

Table S2 Accession numbers of HKT proteins from the different species

| Species                     | Gene          | Accession number |
|-----------------------------|---------------|------------------|
| <i>Ipomoea nil</i>          | <i>InHKT6</i> | XP_019188746.1   |
| <i>Ipomoea batatas</i>      | <i>IbHKT1</i> | AMY98959.1       |
| <i>Nicotiana tabacum</i>    | <i>NtHKT1</i> | XP_016457809.1   |
| <i>Arabidopsis thaliana</i> | <i>AtHKT1</i> | OAO98616.1       |
| <i>Manihot esculenta</i>    | <i>MeHKT1</i> | XP_021620110.1   |
| <i>Glycine max</i>          | <i>GmHKT1</i> | XP_006582258.1   |
| <i>Triticum aestivum</i>    | <i>TaHKT8</i> | ABG33945.1       |
| <i>Oryza sativa</i>         | <i>OsHKT6</i> | XP_015626193.1   |

|                             |               |                |
|-----------------------------|---------------|----------------|
| <i>Solanum tuberosum</i>    | <i>StHKT1</i> | XP_006359731.1 |
| <i>Vitis vinifera</i>       | <i>VvHKT1</i> | RVW85979.1     |
| <i>Sesamum indicum</i>      | <i>SiHKT1</i> | XP_011077901.1 |
| <i>Lycium barbarum</i>      | <i>LbHKT1</i> | AXY40149.1     |
| <i>Solanum lycopersicum</i> | <i>SlHKT1</i> | NP_001295273.1 |

---
